# Supplementary material for: Single mammalian cell encapsulation by in situ polymerization
Source: Royal Society of Chemistry journal article supplement (doi:10.1039/c6tb02491b), 2016-01-01
Supplement: c6tb02491b1.pdf [file c6tb02491b1.pdf]

## Electronic Supplementary Information

### Single mammalian cell encapsulation by *in situ* polymerization

**Jianmin Yang,<sup>a</sup> Jingchao Li,<sup>a,b</sup> Xinlong Wang,<sup>a,b</sup> Xiaomeng Li,<sup>a,b</sup> Naoki Kawazoe<sup>a</sup> and  
Guoping Chen\*<sup>a,b</sup>**

<sup>a</sup> *International Center for Materials Nanoarchitectonics, National Institute for Materials Science, 1-1 Namiki, Tsukuba, Ibaraki 305-0044, Japan.*

<sup>b</sup> *Department of Materials Science and Engineering, Graduate School of Pure and Applied Sciences, University of Tsukuba, 1-1-1 Tennodai, Tsukuba, Ibaraki 305-8577, Japan.*

*E-mail: Guoping.CHEN@nims.go.jp*

**Materials.** HeLa cells were purchased from Cascade Biologics (JCRB cell bank, Tokyo, Japan), hMSCs were purchased from Lonza (Walkersville MD, USA), and BACs were isolated from the articular cartilage derived from a 9-week old female calf. Eagle's Minimum Essential Medium (EMEM), Dulbecco's modified Eagle's medium (DMEM), L-glutamine, penicillin, streptomycin, trypsin/EDTA, *N*-acryloxysuccinimide (NAS), acrylamide (AAm), glycerol dimethacrylate (GDMA), *N,N,N',N'*-tetramethylethylenediamine (TMEDA), branched polyethylenimine (PEI) (Mw = 25 kDa by LS), and 0.4% trypan blue were purchased from Sigma-Aldrich (St Louis, MO, USA). Fetal bovine serum (FBS) was purchased from Gibco Laboratories (Grand Island, NY, USA). Dimethyl sulfoxide (DMSO), chloroform-d ( $\text{CDCl}_3$ ), ammonium persulphate (APS), 25% glutaraldehyde solution, hydrogen tetrachloroaurate tetrahydrate ( $\text{HAuCl}_4 \cdot 4\text{H}_2\text{O}$ ), (3-aminopropyl)triethoxysilane (APTES), and trisodium citrate dehydrate were obtained from Wako Pure Chemical (Osaka, Japan). WST-1 reagent was obtained from Roche Molecular Biochemicals (Mannheim, Germany). Cellmask™ Deep Red plasma membrane stain, human CD44s pan specific antibody monoclonal mouse IgG<sub>2A</sub> clone (primary antibodies), and Alexa Fluor@488 goat anti-mouse IgG(H+L) (secondary antibodies) were purchased from Life technologies (USA). Cellstain live/dead double staining kit and 4'-6-diamidino-2-phenylindole (DAPI) solution were purchased from Dojindo Laboratories (Kumamoto, Japan). FITC-PEG-SH (Mw = 5 kDa) and mPEG-SH (Mw = 5 kDa) were obtained from Nanocs, Inc. (Boston, USA). All the chemical reagents were used as received without further purification. Water used in all the experiments was ultrapure water with a resistivity of 18.2 MΩ cm purified by a Q-POD Milli-Q water purification system (Millipore Corp., USA).

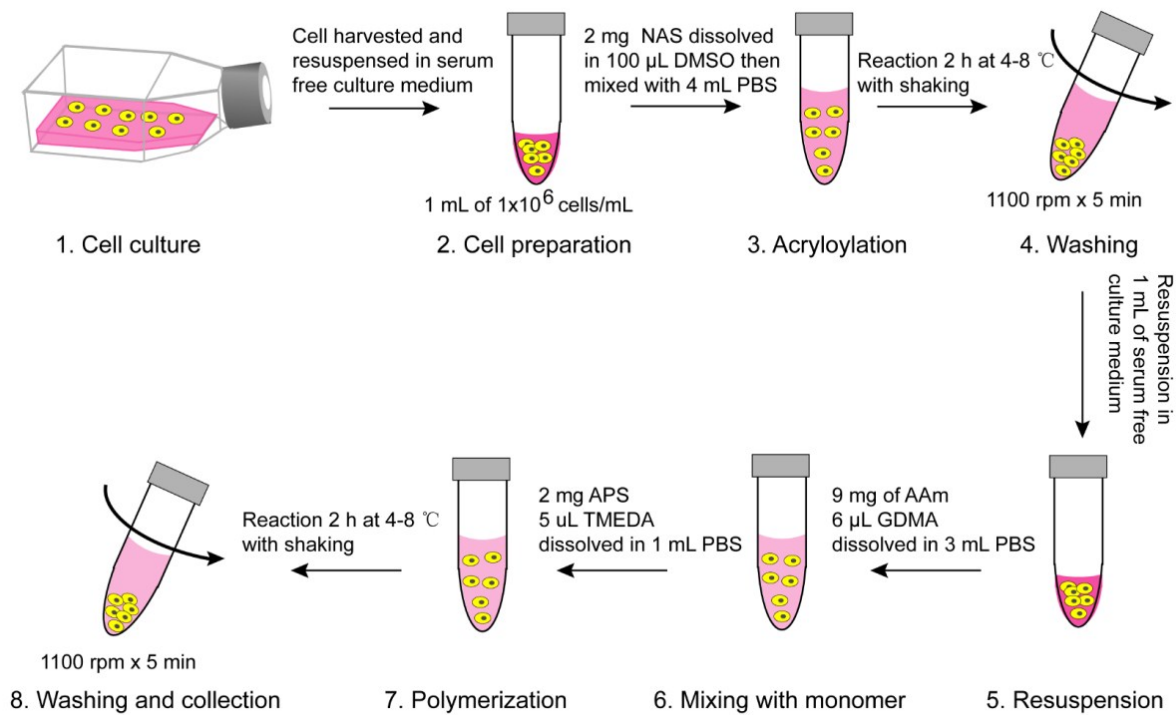

**Figure S1.** Schematics of experimental procedures for single mammalian cell encapsulation.

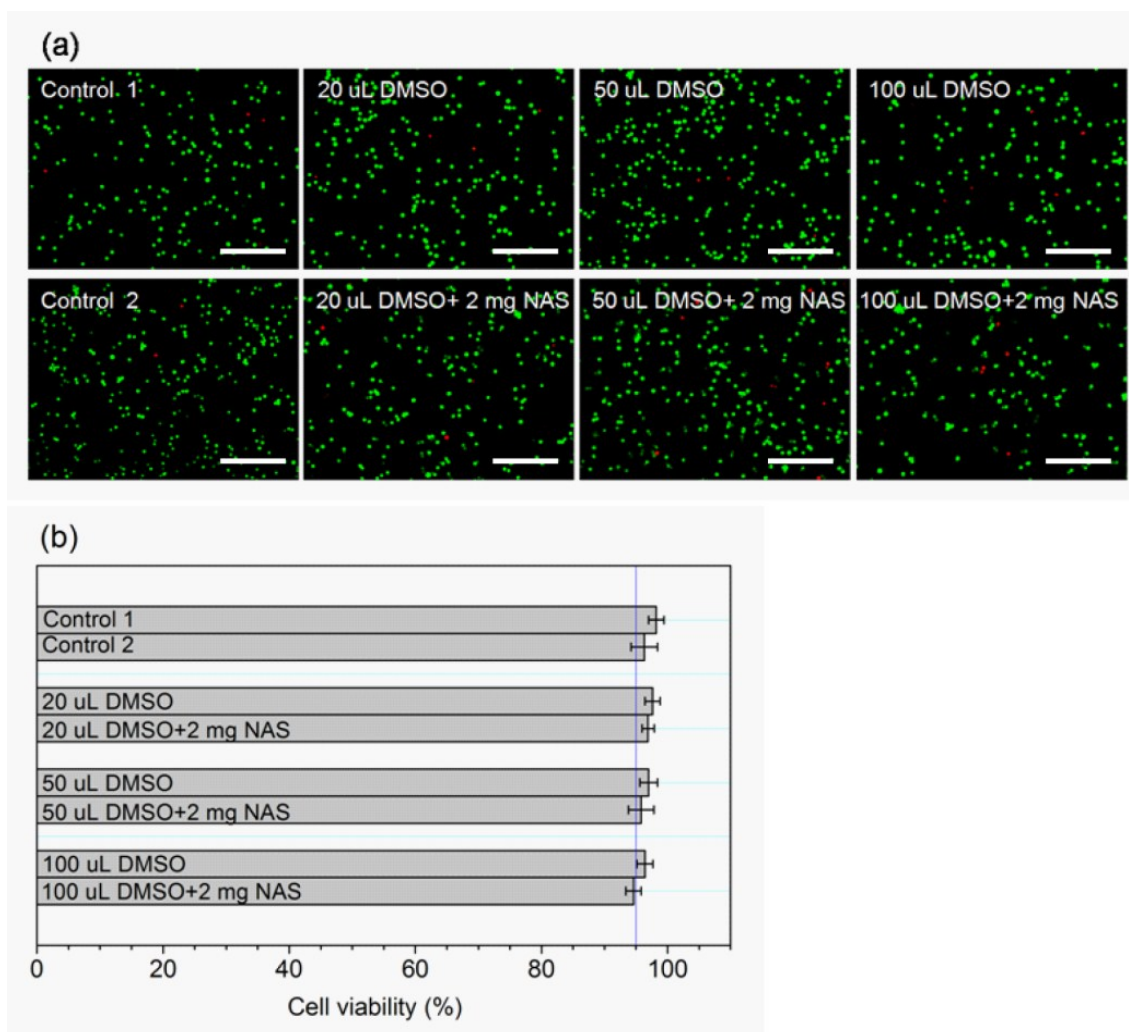

**Figure S2.** Viability of HeLa cells in surface acryloylation step with various volume of DMSO. (a) Representative images of HeLa cells with live/dead staining, cells in green were considered alive, and the ones in red were considered dead. The scale bar in all the images is 200  $\mu$ m. (b) The cell viability of HeLa cells in each condition measured by WST-1 assay. The total reaction medium was 5 mL, control 1 means the reaction medium was 5 mL of culture medium, and the reaction medium for control 2 and other samples were 1 mL of culture medium mixing with 4 mL of PBS. All groups have no significant difference after statistical analysis.

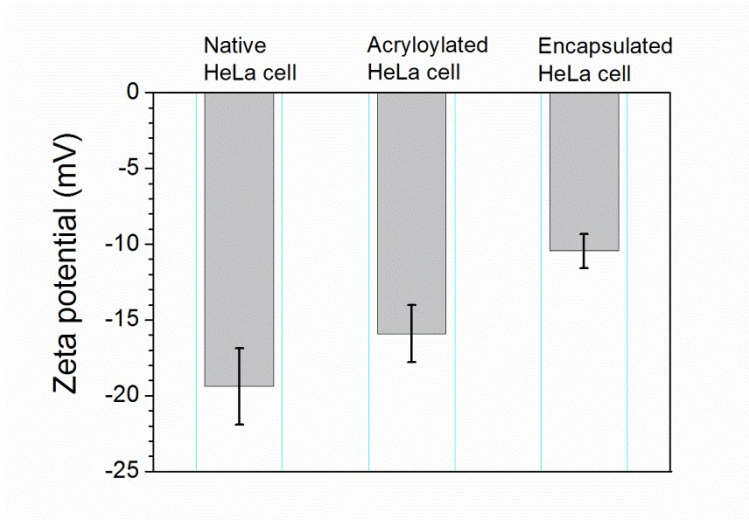

**Figure S3.** Zeta potential of native HeLa cells, acryloylated HeLa cells and encapsulated HeLa cells.

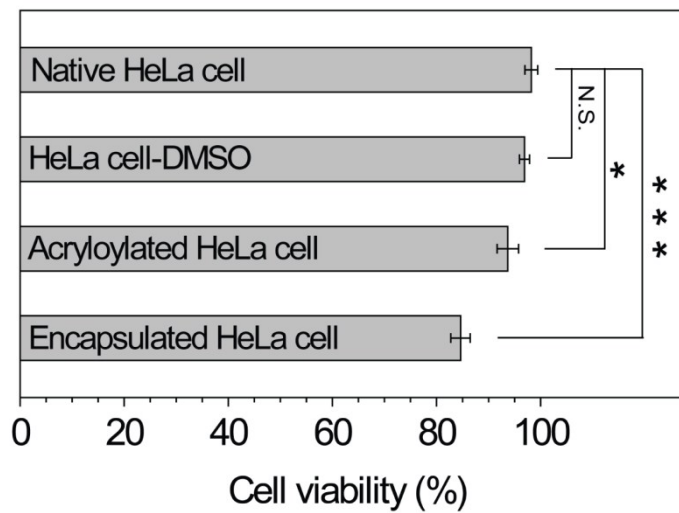

**Figure S4.** Cell viability of HeLa cells by live/dead staining. N.S., not significant; \* $p < 0.05$ ; \*\*\* $p < 0.001$ .

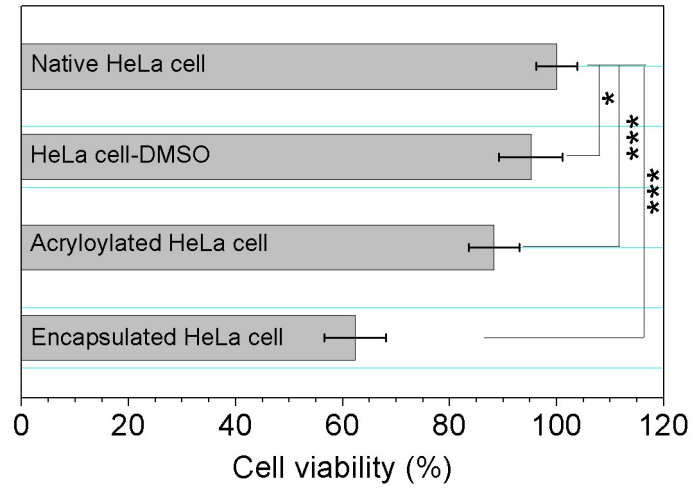

**Figure S5.** Cell viability of HeLa cells after 8 h of culture. The optical density value of native HeLa cells denote as activity of 100 %. \* $p < 0.05$ ; \*\*\* $p < 0.001$ .

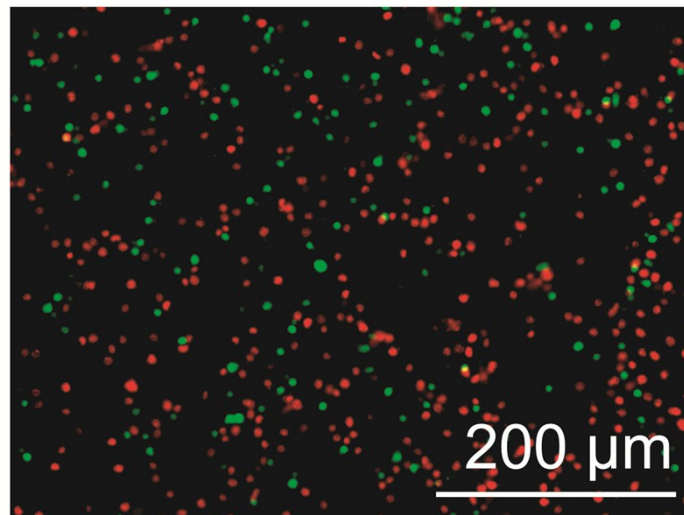

**Figure S6.** Live/dead staining of encapsulated HeLa cells after 3 days cultivation. Cells in green were considered alive, and cell in red were considered dead.

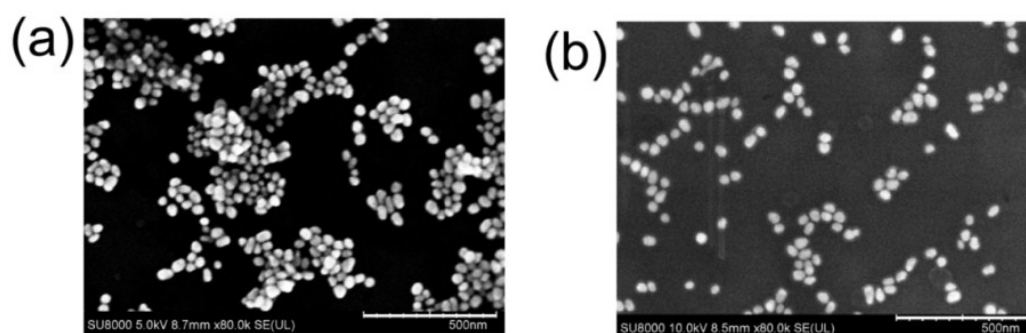

**Figure S7.** FE-SEM micrographs of (a) AuNPs and (b) FITC-PEG-AuNPs. The scale bar is 500 nm.

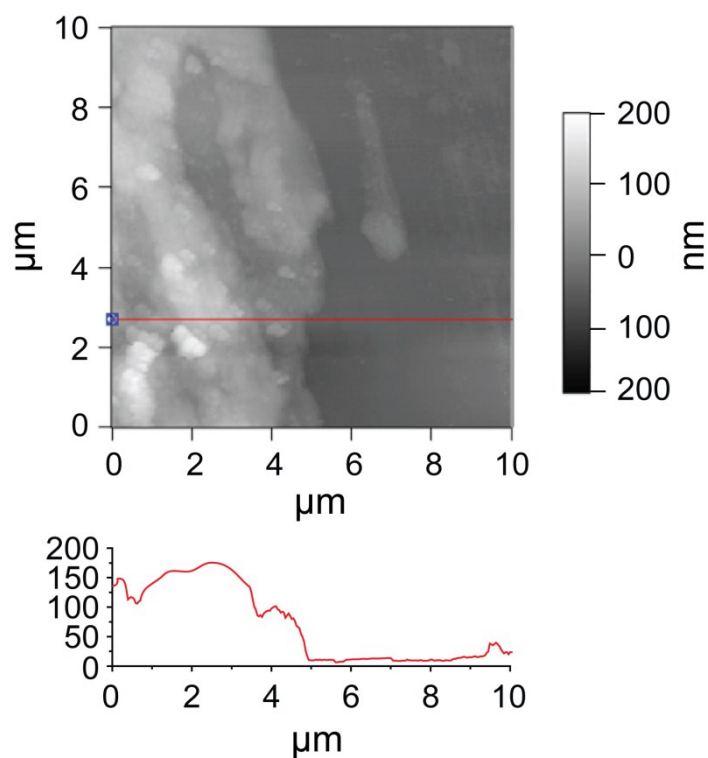

**Figure S8.** Height images (up) and section view (down) of a silicon wafer surface with grafted polymer encapsulation shell on the left half and bare surface on the right half. The images were scanned by AFM.
